# Supplementary material for: Kinetics of the interfacial curing reaction for an epoxy–amine mixture
Source: Royal Society of Chemistry journal article supplement (doi:10.1039/d2cp03394a), 2022-01-01
Supplement: d2cp03394a1.pdf [file d2cp03394a1.pdf]

Electronic Supplementary Information (ESI)

## **Kinetics of Interfacial Curing Reaction for an Epoxy-Amine Mixture**

Ko Yamaguchi<sup>1</sup>, Daisuke Kawaguchi<sup>1,2\*</sup>, Noboru Miyata<sup>3</sup>, Tsukasa Miyazaki<sup>3</sup>,  
Hiroyuki Aoki<sup>4,5</sup>, Satoru Yamamoto<sup>2</sup>, and Keiji Tanaka<sup>1,2\*</sup>

<sup>1</sup> Department of Applied Chemistry, Kyushu University, Fukuoka, Japan

<sup>2</sup> Center for Polymer Interface and Molecular Adhesion Science, Kyushu University, Fukuoka 819-0395, Japan

<sup>3</sup> Neutron Science and Technology Center, Comprehensive Research Organization for Science and Society, 162-1 Shirakata, Tokai, Naka, Ibaraki 319-1106, Japan

<sup>4</sup> Materials and Life Science Division, J-PARC Center, Japan Atomic Energy Agency, 2-4 Shirakata, Tokai, Ibaraki 319-1195, Japan

<sup>5</sup> Institute of Materials Structure Science, High Energy Accelerator Research Organization, 203-1 Shirakata, Tokai, Naka, Ibaraki 319-1106, Japan

Tel: +81-92-802-2878

E-mail: d-kawaguchi@cstf.kyushu-u.ac.jp and k-tanaka@cstf.kyushu-u.ac.jp

**1. Interfacial orientation of 4,4'-diaminodiphenyl sulfone (DDS).** Figure S1 shows sum-frequency generation (SFG) spectra for a 4,4'-diaminodiphenyl sulfone (DDS) film sandwiched by quartz substrates. The measurement was conducted at 403 K as a function of time. For clarity, each spectrum has been vertically shifted. A peak observed at 3,370  $\text{cm}^{-1}$  was assignable to the symmetric stretching of amino groups ( $\text{NH}_2$ s). The peak intensity for  $\text{NH}_2$ s did not change with annealing at 403 K. This means that  $\text{NH}_2$  groups remained oriented under this condition unless they reacted with epoxy groups.

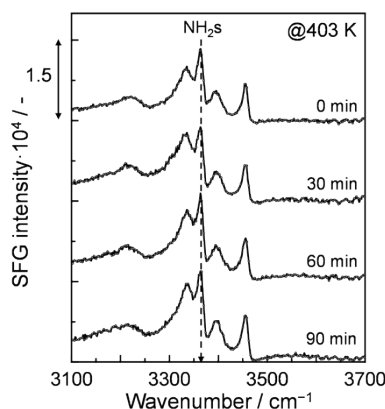

**Figure S1.** SFG spectra for a DDS film at 403 K as a function of time.

**2. Mixing ratio dependence of curing kinetics.** Reaction kinetics for epoxy phenol novolac and DDS with different mixing ratios were examined. Fourier transform infrared spectroscopy and SFG spectroscopy were conducted to obtain the apparent reaction rate constant ( $k$ ) in the bulk and at the outermost interface, respectively. Based on the Arrhenius analysis using eq. (2) in the main text, the activation energy ( $E_a$ ) and the frequency factor ( $A$ ) were obtained. Panels (a) and (b) of Figure S2 show mixing ratio dependence of  $E_a$  and  $A$ , respectively. The  $E_a$  value was constant at ca. 57  $\text{kJ}\cdot\text{mol}^{-1}$  in the bulk and at the outermost interface, independent of the mixing ratio.

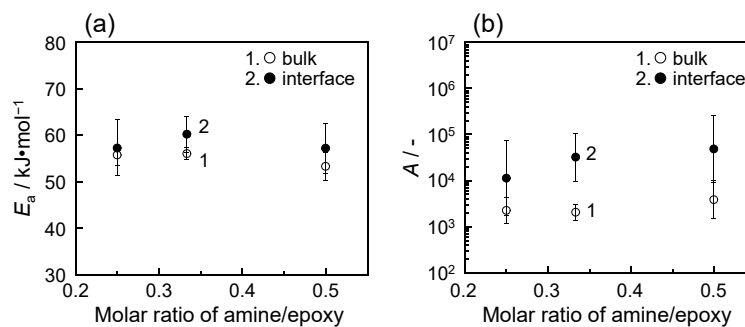

**Figure S2.** Mixing ratio dependence of (a)  $E_a$  and (b)  $A$  obtained by Arrhenius analysis.
